# Supplementary material for: Molecular dynamics simulations of pentacene thin films: The effect of surface on polymorph selection
Source: Royal Society of Chemistry journal article supplement (doi:10.1039/c0jm01577f), 2010-01-01
Supplement: c0jm01577f.pdf [file c0jm01577f.pdf]

```

; penglb.itp
;
; b3lyp/6-31g(d) resp charge.

#if defined WILLIAMS
; model W, Williams IV buckingham potential.
[ defaults ]
; nbfunc      comb-rule      gen-pairs      fudgeLJ fudgeQQ
2              2              no              0.5      0.8333

[ atomtypes ]
;name          mass      charge  ptype  a          b          c
ha             ha       1.0080  0.0000  A      0.11104e+05  3.74000e+01  0.11422e-03
ca             ca       12.0100 0.0000  A      3.49908e+05  3.60000e+01  2.37651e-03

[ nonbond_params ]
; ai   aj   funct          a          b          c
ha    ha   2           0.11104e+05  3.74000e+01  0.11422e-03
ca    ca   2           3.49908e+05  3.60000e+01  2.37651e-03
ca    ha   2           0.36677e+05  3.67000e+01  0.52300e-03

[ pairtypes ]
; ai   aj   funct          sigma      epsilon
ha    ha   1           2.59964e-01  0.31380e-01
ca    ca   1           3.39967e-01  1.79912e-01
ca    ha   1           2.99966e-01  0.75137e-01
#elif defined YOKOI
; model Y, Yokoi95 buckingham potential.
[ defaults ]
; nbfunc      comb-rule      gen-pairs      fudgeLJ fudgeQQ
2              2              no              0.5      0.8333

[ atomtypes ]
;name          mass      charge  ptype  a          b          c
ha             ha       1.0080  0.0000  A      0.34548e+05  4.09162e+01  0.16543e-03
ca             ca       12.0100 0.0000  A      5.91346e+07  5.25427e+01  1.89560e-03

```

```

[ nonbond_params ]
; ai   aj   funct           a           b           c
ha    ha    2           0.34548e+05  4.09162e+01  0.16543e-03
ca    ca    2           5.91346e+07  5.25427e+01  1.89560e-03
ca    ha    2           1.01672e+06  4.60820e+01  0.57773e-03

[ pairtypes ]
; ai   aj   funct           sigma      epsilon
ha    ha    1           2.59964e-01  0.31380e-01
ca    ca    1           3.39967e-01  1.79912e-01
ca    ha    1           2.99966e-01  0.75137e-01
#else
; model G, General Amber Force Field (GAFF).

[ defaults ]
; nbfunc      comb-rule      gen-pairs      fudgeLJ fudgeQQ
1             2             yes            0.5      0.8333

[ atomtypes ]
;name bond_type  mass  charge  ptype  sigma      epsilon
ha      ha      1.0080  0.0000  A      2.59964e-01  6.27600e-02
ca      ca      12.0100  0.0000  A      3.39967e-01  3.59824e-01
n1      n1      14.0100  0.0000  A      3.25000e-01  7.11280e-01
sio2    sio2    20.0300  0.0000  A      3.00000e-01  8.00000e-01 ; for surface
#endif

[ moleculetype ]
; Name          nrexcl
pentc          3

[ atoms ]
;  nr      type  resnr  residue  atom  cgnr      charge      mass
  1        ca    1      MOL     C0    1      -0.22144  12.0100
  2        ca    1      MOL     C1    1      -0.10233  12.0100
  3        ca    1      MOL     C2    2      -0.10233  12.0100

```

|    |    |   |     |     |    |          |         |
|----|----|---|-----|-----|----|----------|---------|
| 4  | ca | 1 | MOL | C3  | 2  | -0.22144 | 12.0100 |
| 5  | ca | 1 | MOL | C4  | 3  | 0.16215  | 12.0100 |
| 6  | ca | 1 | MOL | C5  | 4  | 0.16215  | 12.0100 |
| 7  | ca | 1 | MOL | C6  | 3  | -0.30138 | 12.0100 |
| 8  | ca | 1 | MOL | C7  | 5  | 0.12039  | 12.0100 |
| 9  | ca | 1 | MOL | C8  | 6  | 0.12039  | 12.0100 |
| 10 | ca | 1 | MOL | C9  | 4  | -0.30138 | 12.0100 |
| 11 | ca | 1 | MOL | C10 | 6  | -0.24767 | 12.0100 |
| 12 | ha | 1 | MOL | H0  | 1  | 0.13263  | 1.0080  |
| 13 | ha | 1 | MOL | H1  | 1  | 0.11701  | 1.0080  |
| 14 | ha | 1 | MOL | H2  | 2  | 0.11701  | 1.0080  |
| 15 | ha | 1 | MOL | H3  | 2  | 0.13263  | 1.0080  |
| 16 | ha | 1 | MOL | H4  | 3  | 0.14777  | 1.0080  |
| 17 | ha | 1 | MOL | H5  | 4  | 0.14777  | 1.0080  |
| 18 | ha | 1 | MOL | H6  | 6  | 0.13807  | 1.0080  |
| 19 | ca | 1 | MOL | C11 | 9  | -0.22144 | 12.0100 |
| 20 | ca | 1 | MOL | C12 | 9  | -0.10233 | 12.0100 |
| 21 | ca | 1 | MOL | C13 | 10 | -0.10233 | 12.0100 |
| 22 | ca | 1 | MOL | C14 | 10 | -0.22144 | 12.0100 |
| 23 | ca | 1 | MOL | C15 | 7  | 0.16215  | 12.0100 |
| 24 | ca | 1 | MOL | C16 | 8  | 0.16215  | 12.0100 |
| 25 | ca | 1 | MOL | C17 | 7  | -0.30138 | 12.0100 |
| 26 | ca | 1 | MOL | C18 | 6  | 0.12039  | 12.0100 |
| 27 | ca | 1 | MOL | C19 | 5  | 0.12039  | 12.0100 |
| 28 | ca | 1 | MOL | C20 | 8  | -0.30138 | 12.0100 |
| 29 | ca | 1 | MOL | C21 | 5  | -0.24767 | 12.0100 |
| 30 | ha | 1 | MOL | H7  | 9  | 0.13263  | 1.0080  |
| 31 | ha | 1 | MOL | H8  | 9  | 0.11701  | 1.0080  |
| 32 | ha | 1 | MOL | H9  | 10 | 0.11701  | 1.0080  |
| 33 | ha | 1 | MOL | H10 | 10 | 0.13263  | 1.0080  |
| 34 | ha | 1 | MOL | H11 | 7  | 0.14777  | 1.0080  |
| 35 | ha | 1 | MOL | H12 | 8  | 0.14777  | 1.0080  |
| 36 | ha | 1 | MOL | H13 | 5  | 0.13807  | 1.0080  |

[ bonds ]

; ai aj funct r k

|    |    |   |            |            |
|----|----|---|------------|------------|
| 1  | 12 | 1 | 1.0870e-01 | 2.8811e+05 |
| 2  | 13 | 1 | 1.0870e-01 | 2.8811e+05 |
| 3  | 14 | 1 | 1.0870e-01 | 2.8811e+05 |
| 4  | 15 | 1 | 1.0870e-01 | 2.8811e+05 |
| 7  | 16 | 1 | 1.0870e-01 | 2.8811e+05 |
| 10 | 17 | 1 | 1.0870e-01 | 2.8811e+05 |
| 11 | 18 | 1 | 1.0870e-01 | 2.8811e+05 |
| 19 | 30 | 1 | 1.0870e-01 | 2.8811e+05 |
| 20 | 31 | 1 | 1.0870e-01 | 2.8811e+05 |
| 21 | 32 | 1 | 1.0870e-01 | 2.8811e+05 |
| 22 | 33 | 1 | 1.0870e-01 | 2.8811e+05 |
| 25 | 34 | 1 | 1.0870e-01 | 2.8811e+05 |
| 28 | 35 | 1 | 1.0870e-01 | 2.8811e+05 |
| 29 | 36 | 1 | 1.0870e-01 | 2.8811e+05 |
| 1  | 2  | 1 | 1.3870e-01 | 4.0033e+05 |
| 1  | 6  | 1 | 1.3870e-01 | 4.0033e+05 |
| 2  | 3  | 1 | 1.3870e-01 | 4.0033e+05 |
| 3  | 4  | 1 | 1.3870e-01 | 4.0033e+05 |
| 4  | 5  | 1 | 1.3870e-01 | 4.0033e+05 |
| 5  | 6  | 1 | 1.3870e-01 | 4.0033e+05 |
| 5  | 7  | 1 | 1.3870e-01 | 4.0033e+05 |
| 6  | 10 | 1 | 1.3870e-01 | 4.0033e+05 |
| 7  | 8  | 1 | 1.3870e-01 | 4.0033e+05 |
| 8  | 9  | 1 | 1.3870e-01 | 4.0033e+05 |
| 8  | 29 | 1 | 1.3870e-01 | 4.0033e+05 |
| 9  | 10 | 1 | 1.3870e-01 | 4.0033e+05 |
| 9  | 11 | 1 | 1.3870e-01 | 4.0033e+05 |
| 11 | 26 | 1 | 1.3870e-01 | 4.0033e+05 |
| 19 | 20 | 1 | 1.3870e-01 | 4.0033e+05 |
| 19 | 24 | 1 | 1.3870e-01 | 4.0033e+05 |
| 20 | 21 | 1 | 1.3870e-01 | 4.0033e+05 |
| 21 | 22 | 1 | 1.3870e-01 | 4.0033e+05 |
| 22 | 23 | 1 | 1.3870e-01 | 4.0033e+05 |
| 23 | 24 | 1 | 1.3870e-01 | 4.0033e+05 |
| 23 | 25 | 1 | 1.3870e-01 | 4.0033e+05 |
| 24 | 28 | 1 | 1.3870e-01 | 4.0033e+05 |

|    |    |   |            |            |
|----|----|---|------------|------------|
| 25 | 26 | 1 | 1.3870e-01 | 4.0033e+05 |
| 26 | 27 | 1 | 1.3870e-01 | 4.0033e+05 |
| 27 | 28 | 1 | 1.3870e-01 | 4.0033e+05 |
| 27 | 29 | 1 | 1.3870e-01 | 4.0033e+05 |

[ pairs ]

| ; | ai | aj | funct |
|---|----|----|-------|
|   | 1  | 14 | 1     |
|   | 1  | 17 | 1     |
|   | 2  | 15 | 1     |
|   | 12 | 3  | 1     |
|   | 4  | 13 | 1     |
|   | 4  | 16 | 1     |
|   | 5  | 14 | 1     |
|   | 12 | 5  | 1     |
|   | 5  | 17 | 1     |
|   | 6  | 13 | 1     |
|   | 6  | 15 | 1     |
|   | 6  | 16 | 1     |
|   | 7  | 15 | 1     |
|   | 7  | 36 | 1     |
|   | 8  | 17 | 1     |
|   | 8  | 18 | 1     |
|   | 9  | 16 | 1     |
|   | 9  | 36 | 1     |
|   | 12 | 10 | 1     |
|   | 10 | 18 | 1     |
|   | 11 | 17 | 1     |
|   | 11 | 34 | 1     |
|   | 12 | 13 | 1     |
|   | 13 | 14 | 1     |
|   | 14 | 15 | 1     |
|   | 16 | 29 | 1     |
|   | 18 | 25 | 1     |
|   | 18 | 27 | 1     |
|   | 19 | 32 | 1     |

|    |    |   |
|----|----|---|
| 19 | 35 | 1 |
| 20 | 33 | 1 |
| 21 | 30 | 1 |
| 22 | 31 | 1 |
| 22 | 34 | 1 |
| 23 | 32 | 1 |
| 23 | 30 | 1 |
| 23 | 35 | 1 |
| 24 | 31 | 1 |
| 24 | 33 | 1 |
| 24 | 34 | 1 |
| 25 | 33 | 1 |
| 26 | 35 | 1 |
| 26 | 36 | 1 |
| 27 | 34 | 1 |
| 28 | 30 | 1 |
| 28 | 36 | 1 |
| 29 | 35 | 1 |
| 30 | 31 | 1 |
| 31 | 32 | 1 |
| 32 | 33 | 1 |
| 1  | 4  | 1 |
| 1  | 7  | 1 |
| 1  | 9  | 1 |
| 2  | 5  | 1 |
| 2  | 10 | 1 |
| 6  | 3  | 1 |
| 3  | 7  | 1 |
| 4  | 10 | 1 |
| 4  | 8  | 1 |
| 5  | 9  | 1 |
| 5  | 29 | 1 |
| 6  | 8  | 1 |
| 6  | 11 | 1 |
| 7  | 10 | 1 |
| 7  | 11 | 1 |

|    |    |   |
|----|----|---|
| 7  | 27 | 1 |
| 8  | 26 | 1 |
| 8  | 28 | 1 |
| 9  | 27 | 1 |
| 9  | 25 | 1 |
| 10 | 29 | 1 |
| 10 | 26 | 1 |
| 11 | 29 | 1 |
| 11 | 23 | 1 |
| 11 | 28 | 1 |
| 19 | 22 | 1 |
| 19 | 25 | 1 |
| 19 | 27 | 1 |
| 20 | 23 | 1 |
| 20 | 28 | 1 |
| 21 | 24 | 1 |
| 21 | 25 | 1 |
| 22 | 28 | 1 |
| 22 | 26 | 1 |
| 23 | 27 | 1 |
| 24 | 26 | 1 |
| 24 | 29 | 1 |
| 25 | 28 | 1 |
| 25 | 29 | 1 |

[ angles ]

| ; | ai | aj | ak | funct | theta      | cth        |
|---|----|----|----|-------|------------|------------|
|   | 1  | 2  | 13 | 1     | 1.2001e+02 | 4.0585e+02 |
|   | 2  | 1  | 12 | 1     | 1.2001e+02 | 4.0585e+02 |
|   | 2  | 3  | 14 | 1     | 1.2001e+02 | 4.0585e+02 |
|   | 3  | 2  | 13 | 1     | 1.2001e+02 | 4.0585e+02 |
|   | 3  | 4  | 15 | 1     | 1.2001e+02 | 4.0585e+02 |
|   | 4  | 3  | 14 | 1     | 1.2001e+02 | 4.0585e+02 |
|   | 5  | 4  | 15 | 1     | 1.2001e+02 | 4.0585e+02 |
|   | 5  | 7  | 16 | 1     | 1.2001e+02 | 4.0585e+02 |
|   | 6  | 1  | 12 | 1     | 1.2001e+02 | 4.0585e+02 |

|    |    |    |   |            |            |
|----|----|----|---|------------|------------|
| 6  | 10 | 17 | 1 | 1.2001e+02 | 4.0585e+02 |
| 8  | 7  | 16 | 1 | 1.2001e+02 | 4.0585e+02 |
| 8  | 29 | 36 | 1 | 1.2001e+02 | 4.0585e+02 |
| 9  | 10 | 17 | 1 | 1.2001e+02 | 4.0585e+02 |
| 9  | 11 | 18 | 1 | 1.2001e+02 | 4.0585e+02 |
| 18 | 11 | 26 | 1 | 1.2001e+02 | 4.0585e+02 |
| 19 | 20 | 31 | 1 | 1.2001e+02 | 4.0585e+02 |
| 20 | 19 | 30 | 1 | 1.2001e+02 | 4.0585e+02 |
| 20 | 21 | 32 | 1 | 1.2001e+02 | 4.0585e+02 |
| 21 | 20 | 31 | 1 | 1.2001e+02 | 4.0585e+02 |
| 21 | 22 | 33 | 1 | 1.2001e+02 | 4.0585e+02 |
| 22 | 21 | 32 | 1 | 1.2001e+02 | 4.0585e+02 |
| 23 | 22 | 33 | 1 | 1.2001e+02 | 4.0585e+02 |
| 23 | 25 | 34 | 1 | 1.2001e+02 | 4.0585e+02 |
| 24 | 19 | 30 | 1 | 1.2001e+02 | 4.0585e+02 |
| 24 | 28 | 35 | 1 | 1.2001e+02 | 4.0585e+02 |
| 26 | 25 | 34 | 1 | 1.2001e+02 | 4.0585e+02 |
| 27 | 28 | 35 | 1 | 1.2001e+02 | 4.0585e+02 |
| 27 | 29 | 36 | 1 | 1.2001e+02 | 4.0585e+02 |
| 1  | 2  | 3  | 1 | 1.1997e+02 | 5.6233e+02 |
| 1  | 6  | 5  | 1 | 1.1997e+02 | 5.6233e+02 |
| 1  | 6  | 10 | 1 | 1.1997e+02 | 5.6233e+02 |
| 2  | 1  | 6  | 1 | 1.1997e+02 | 5.6233e+02 |
| 2  | 3  | 4  | 1 | 1.1997e+02 | 5.6233e+02 |
| 3  | 4  | 5  | 1 | 1.1997e+02 | 5.6233e+02 |
| 4  | 5  | 6  | 1 | 1.1997e+02 | 5.6233e+02 |
| 4  | 5  | 7  | 1 | 1.1997e+02 | 5.6233e+02 |
| 5  | 6  | 10 | 1 | 1.1997e+02 | 5.6233e+02 |
| 5  | 7  | 8  | 1 | 1.1997e+02 | 5.6233e+02 |
| 6  | 5  | 7  | 1 | 1.1997e+02 | 5.6233e+02 |
| 6  | 10 | 9  | 1 | 1.1997e+02 | 5.6233e+02 |
| 7  | 8  | 9  | 1 | 1.1997e+02 | 5.6233e+02 |
| 7  | 8  | 29 | 1 | 1.1997e+02 | 5.6233e+02 |
| 8  | 9  | 10 | 1 | 1.1997e+02 | 5.6233e+02 |
| 8  | 9  | 11 | 1 | 1.1997e+02 | 5.6233e+02 |
| 8  | 29 | 27 | 1 | 1.1997e+02 | 5.6233e+02 |



|    |    |    |   |            |            |
|----|----|----|---|------------|------------|
| 9  | 8  | 29 | 1 | 1.1997e+02 | 5.6233e+02 |
| 9  | 11 | 26 | 1 | 1.1997e+02 | 5.6233e+02 |
| 10 | 9  | 11 | 1 | 1.1997e+02 | 5.6233e+02 |
| 11 | 26 | 25 | 1 | 1.1997e+02 | 5.6233e+02 |
| 11 | 26 | 27 | 1 | 1.1997e+02 | 5.6233e+02 |
| 19 | 20 | 21 | 1 | 1.1997e+02 | 5.6233e+02 |
| 19 | 24 | 23 | 1 | 1.1997e+02 | 5.6233e+02 |
| 19 | 24 | 28 | 1 | 1.1997e+02 | 5.6233e+02 |
| 20 | 19 | 24 | 1 | 1.1997e+02 | 5.6233e+02 |
| 20 | 21 | 22 | 1 | 1.1997e+02 | 5.6233e+02 |
| 21 | 22 | 23 | 1 | 1.1997e+02 | 5.6233e+02 |
| 22 | 23 | 24 | 1 | 1.1997e+02 | 5.6233e+02 |
| 22 | 23 | 25 | 1 | 1.1997e+02 | 5.6233e+02 |
| 23 | 24 | 28 | 1 | 1.1997e+02 | 5.6233e+02 |
| 23 | 25 | 26 | 1 | 1.1997e+02 | 5.6233e+02 |
| 24 | 23 | 25 | 1 | 1.1997e+02 | 5.6233e+02 |
| 24 | 28 | 27 | 1 | 1.1997e+02 | 5.6233e+02 |
| 25 | 26 | 27 | 1 | 1.1997e+02 | 5.6233e+02 |
| 26 | 27 | 28 | 1 | 1.1997e+02 | 5.6233e+02 |
| 26 | 27 | 29 | 1 | 1.1997e+02 | 5.6233e+02 |
| 28 | 27 | 29 | 1 | 1.1997e+02 | 5.6233e+02 |

[ dihedrals ]

| ;i      | j  | k | l       | func | C0 | ...      | C5      |           |         |   |
|---------|----|---|---------|------|----|----------|---------|-----------|---------|---|
|         | 1  | 2 | 3       | 14   | 3  | 30.33400 | 0.00000 | -30.33400 | 0.00000 |   |
| 0.00000 |    |   | 0.00000 |      |    |          |         |           |         | ; |
|         | 1  | 6 | 10      | 17   | 3  | 30.33400 | 0.00000 | -30.33400 | 0.00000 |   |
| 0.00000 |    |   | 0.00000 |      |    |          |         |           |         | ; |
|         | 2  | 3 | 4       | 15   | 3  | 30.33400 | 0.00000 | -30.33400 | 0.00000 |   |
| 0.00000 |    |   | 0.00000 |      |    |          |         |           |         | ; |
|         | 12 | 1 | 2       | 3    | 3  | 30.33400 | 0.00000 | -30.33400 | 0.00000 |   |
| 0.00000 |    |   | 0.00000 |      |    |          |         |           |         | ; |
|         | 4  | 3 | 2       | 13   | 3  | 30.33400 | 0.00000 | -30.33400 | 0.00000 |   |
| 0.00000 |    |   | 0.00000 |      |    |          |         |           |         | ; |
|         | 4  | 5 | 7       | 16   | 3  | 30.33400 | 0.00000 | -30.33400 | 0.00000 |   |
| 0.00000 |    |   | 0.00000 |      |    |          |         |           |         | ; |

|         |    |         |    |   |          |         |           |         |
|---------|----|---------|----|---|----------|---------|-----------|---------|
| 5       | 4  | 3       | 14 | 3 | 30.33400 | 0.00000 | -30.33400 | 0.00000 |
| 0.00000 |    | 0.00000 |    |   |          |         |           | ;       |
| 12      | 1  | 6       | 5  | 3 | 30.33400 | 0.00000 | -30.33400 | 0.00000 |
| 0.00000 |    | 0.00000 |    |   |          |         |           | ;       |
| 5       | 6  | 10      | 17 | 3 | 30.33400 | 0.00000 | -30.33400 | 0.00000 |
| 0.00000 |    | 0.00000 |    |   |          |         |           | ;       |
| 6       | 1  | 2       | 13 | 3 | 30.33400 | 0.00000 | -30.33400 | 0.00000 |
| 0.00000 |    | 0.00000 |    |   |          |         |           | ;       |
| 6       | 5  | 4       | 15 | 3 | 30.33400 | 0.00000 | -30.33400 | 0.00000 |
| 0.00000 |    | 0.00000 |    |   |          |         |           | ;       |
| 6       | 5  | 7       | 16 | 3 | 30.33400 | 0.00000 | -30.33400 | 0.00000 |
| 0.00000 |    | 0.00000 |    |   |          |         |           | ;       |
| 7       | 5  | 4       | 15 | 3 | 30.33400 | 0.00000 | -30.33400 | 0.00000 |
| 0.00000 |    | 0.00000 |    |   |          |         |           | ;       |
| 7       | 8  | 29      | 36 | 3 | 30.33400 | 0.00000 | -30.33400 | 0.00000 |
| 0.00000 |    | 0.00000 |    |   |          |         |           | ;       |
| 8       | 9  | 10      | 17 | 3 | 30.33400 | 0.00000 | -30.33400 | 0.00000 |
| 0.00000 |    | 0.00000 |    |   |          |         |           | ;       |
| 8       | 9  | 11      | 18 | 3 | 30.33400 | 0.00000 | -30.33400 | 0.00000 |
| 0.00000 |    | 0.00000 |    |   |          |         |           | ;       |
| 9       | 8  | 7       | 16 | 3 | 30.33400 | 0.00000 | -30.33400 | 0.00000 |
| 0.00000 |    | 0.00000 |    |   |          |         |           | ;       |
| 9       | 8  | 29      | 36 | 3 | 30.33400 | 0.00000 | -30.33400 | 0.00000 |
| 0.00000 |    | 0.00000 |    |   |          |         |           | ;       |
| 12      | 1  | 6       | 10 | 3 | 30.33400 | 0.00000 | -30.33400 | 0.00000 |
| 0.00000 |    | 0.00000 |    |   |          |         |           | ;       |
| 10      | 9  | 11      | 18 | 3 | 30.33400 | 0.00000 | -30.33400 | 0.00000 |
| 0.00000 |    | 0.00000 |    |   |          |         |           | ;       |
| 11      | 9  | 10      | 17 | 3 | 30.33400 | 0.00000 | -30.33400 | 0.00000 |
| 0.00000 |    | 0.00000 |    |   |          |         |           | ;       |
| 11      | 26 | 25      | 34 | 3 | 30.33400 | 0.00000 | -30.33400 | 0.00000 |
| 0.00000 |    | 0.00000 |    |   |          |         |           | ;       |
| 12      | 1  | 2       | 13 | 3 | 30.33400 | 0.00000 | -30.33400 | 0.00000 |
| 0.00000 |    | 0.00000 |    |   |          |         |           | ;       |
| 13      | 2  | 3       | 14 | 3 | 30.33400 | 0.00000 | -30.33400 | 0.00000 |
| 0.00000 |    | 0.00000 |    |   |          |         |           | ;       |

|         |    |         |    |   |          |         |           |         |
|---------|----|---------|----|---|----------|---------|-----------|---------|
| 14      | 3  | 4       | 15 | 3 | 30.33400 | 0.00000 | -30.33400 | 0.00000 |
| 0.00000 |    | 0.00000 |    |   |          |         |           |         |
| 16      | 7  | 8       | 29 | 3 | 30.33400 | 0.00000 | -30.33400 | 0.00000 |
| 0.00000 |    | 0.00000 |    |   |          |         |           |         |
| 18      | 11 | 26      | 25 | 3 | 30.33400 | 0.00000 | -30.33400 | 0.00000 |
| 0.00000 |    | 0.00000 |    |   |          |         |           |         |
| 18      | 11 | 26      | 27 | 3 | 30.33400 | 0.00000 | -30.33400 | 0.00000 |
| 0.00000 |    | 0.00000 |    |   |          |         |           |         |
| 19      | 20 | 21      | 32 | 3 | 30.33400 | 0.00000 | -30.33400 | 0.00000 |
| 0.00000 |    | 0.00000 |    |   |          |         |           |         |
| 19      | 24 | 28      | 35 | 3 | 30.33400 | 0.00000 | -30.33400 | 0.00000 |
| 0.00000 |    | 0.00000 |    |   |          |         |           |         |
| 20      | 21 | 22      | 33 | 3 | 30.33400 | 0.00000 | -30.33400 | 0.00000 |
| 0.00000 |    | 0.00000 |    |   |          |         |           |         |
| 21      | 20 | 19      | 30 | 3 | 30.33400 | 0.00000 | -30.33400 | 0.00000 |
| 0.00000 |    | 0.00000 |    |   |          |         |           |         |
| 22      | 21 | 20      | 31 | 3 | 30.33400 | 0.00000 | -30.33400 | 0.00000 |
| 0.00000 |    | 0.00000 |    |   |          |         |           |         |
| 22      | 23 | 25      | 34 | 3 | 30.33400 | 0.00000 | -30.33400 | 0.00000 |
| 0.00000 |    | 0.00000 |    |   |          |         |           |         |
| 23      | 22 | 21      | 32 | 3 | 30.33400 | 0.00000 | -30.33400 | 0.00000 |
| 0.00000 |    | 0.00000 |    |   |          |         |           |         |
| 23      | 24 | 19      | 30 | 3 | 30.33400 | 0.00000 | -30.33400 | 0.00000 |
| 0.00000 |    | 0.00000 |    |   |          |         |           |         |
| 23      | 24 | 28      | 35 | 3 | 30.33400 | 0.00000 | -30.33400 | 0.00000 |
| 0.00000 |    | 0.00000 |    |   |          |         |           |         |
| 24      | 19 | 20      | 31 | 3 | 30.33400 | 0.00000 | -30.33400 | 0.00000 |
| 0.00000 |    | 0.00000 |    |   |          |         |           |         |
| 24      | 23 | 22      | 33 | 3 | 30.33400 | 0.00000 | -30.33400 | 0.00000 |
| 0.00000 |    | 0.00000 |    |   |          |         |           |         |
| 24      | 23 | 25      | 34 | 3 | 30.33400 | 0.00000 | -30.33400 | 0.00000 |
| 0.00000 |    | 0.00000 |    |   |          |         |           |         |
| 25      | 23 | 22      | 33 | 3 | 30.33400 | 0.00000 | -30.33400 | 0.00000 |
| 0.00000 |    | 0.00000 |    |   |          |         |           |         |
| 26      | 27 | 28      | 35 | 3 | 30.33400 | 0.00000 | -30.33400 | 0.00000 |
| 0.00000 |    | 0.00000 |    |   |          |         |           |         |

|         |         |    |    |   |          |         |           |         |
|---------|---------|----|----|---|----------|---------|-----------|---------|
| 26      | 27      | 29 | 36 | 3 | 30.33400 | 0.00000 | -30.33400 | 0.00000 |
| 0.00000 | 0.00000 |    |    |   |          |         |           |         |
| 27      | 26      | 25 | 34 | 3 | 30.33400 | 0.00000 | -30.33400 | 0.00000 |
| 0.00000 | 0.00000 |    |    |   |          |         |           |         |
| 28      | 24      | 19 | 30 | 3 | 30.33400 | 0.00000 | -30.33400 | 0.00000 |
| 0.00000 | 0.00000 |    |    |   |          |         |           |         |
| 28      | 27      | 29 | 36 | 3 | 30.33400 | 0.00000 | -30.33400 | 0.00000 |
| 0.00000 | 0.00000 |    |    |   |          |         |           |         |
| 29      | 27      | 28 | 35 | 3 | 30.33400 | 0.00000 | -30.33400 | 0.00000 |
| 0.00000 | 0.00000 |    |    |   |          |         |           |         |
| 30      | 19      | 20 | 31 | 3 | 30.33400 | 0.00000 | -30.33400 | 0.00000 |
| 0.00000 | 0.00000 |    |    |   |          |         |           |         |
| 31      | 20      | 21 | 32 | 3 | 30.33400 | 0.00000 | -30.33400 | 0.00000 |
| 0.00000 | 0.00000 |    |    |   |          |         |           |         |
| 32      | 21      | 22 | 33 | 3 | 30.33400 | 0.00000 | -30.33400 | 0.00000 |
| 0.00000 | 0.00000 |    |    |   |          |         |           |         |
| 12      | 1       | 6  | 2  | 3 | 9.20480  | 0.00000 | -9.20480  | 0.00000 |
| 0.00000 | 0.00000 |    |    |   |          |         |           |         |
| 1       | 3       | 2  | 13 | 3 | 9.20480  | 0.00000 | -9.20480  | 0.00000 |
| 0.00000 | 0.00000 |    |    |   |          |         |           |         |
| 2       | 4       | 3  | 14 | 3 | 9.20480  | 0.00000 | -9.20480  | 0.00000 |
| 0.00000 | 0.00000 |    |    |   |          |         |           |         |
| 3       | 5       | 4  | 15 | 3 | 9.20480  | 0.00000 | -9.20480  | 0.00000 |
| 0.00000 | 0.00000 |    |    |   |          |         |           |         |
| 5       | 8       | 7  | 16 | 3 | 9.20480  | 0.00000 | -9.20480  | 0.00000 |
| 0.00000 | 0.00000 |    |    |   |          |         |           |         |
| 6       | 9       | 10 | 17 | 3 | 9.20480  | 0.00000 | -9.20480  | 0.00000 |
| 0.00000 | 0.00000 |    |    |   |          |         |           |         |
| 9       | 26      | 11 | 18 | 3 | 9.20480  | 0.00000 | -9.20480  | 0.00000 |
| 0.00000 | 0.00000 |    |    |   |          |         |           |         |
| 20      | 24      | 19 | 30 | 3 | 9.20480  | 0.00000 | -9.20480  | 0.00000 |
| 0.00000 | 0.00000 |    |    |   |          |         |           |         |
| 19      | 21      | 20 | 31 | 3 | 9.20480  | 0.00000 | -9.20480  | 0.00000 |
| 0.00000 | 0.00000 |    |    |   |          |         |           |         |
| 20      | 22      | 21 | 32 | 3 | 9.20480  | 0.00000 | -9.20480  | 0.00000 |
| 0.00000 | 0.00000 |    |    |   |          |         |           |         |

|          |    |          |    |   |           |          |            |          |
|----------|----|----------|----|---|-----------|----------|------------|----------|
| 21       | 23 | 22       | 33 | 3 | 9. 20480  | 0. 00000 | -9. 20480  | 0. 00000 |
| 0. 00000 |    | 0. 00000 |    |   |           |          |            | ;        |
| 23       | 26 | 25       | 34 | 3 | 9. 20480  | 0. 00000 | -9. 20480  | 0. 00000 |
| 0. 00000 |    | 0. 00000 |    |   |           |          |            | ;        |
| 24       | 27 | 28       | 35 | 3 | 9. 20480  | 0. 00000 | -9. 20480  | 0. 00000 |
| 0. 00000 |    | 0. 00000 |    |   |           |          |            | ;        |
| 8        | 27 | 29       | 36 | 3 | 9. 20480  | 0. 00000 | -9. 20480  | 0. 00000 |
| 0. 00000 |    | 0. 00000 |    |   |           |          |            | ;        |
| 1        | 2  | 3        | 4  | 3 | 30. 33400 | 0. 00000 | -30. 33400 | 0. 00000 |
| 0. 00000 |    | 0. 00000 |    |   |           |          |            | ;        |
| 1        | 6  | 5        | 4  | 3 | 30. 33400 | 0. 00000 | -30. 33400 | 0. 00000 |
| 0. 00000 |    | 0. 00000 |    |   |           |          |            | ;        |
| 1        | 6  | 5        | 7  | 3 | 30. 33400 | 0. 00000 | -30. 33400 | 0. 00000 |
| 0. 00000 |    | 0. 00000 |    |   |           |          |            | ;        |
| 1        | 6  | 10       | 9  | 3 | 30. 33400 | 0. 00000 | -30. 33400 | 0. 00000 |
| 0. 00000 |    | 0. 00000 |    |   |           |          |            | ;        |
| 2        | 1  | 6        | 5  | 3 | 30. 33400 | 0. 00000 | -30. 33400 | 0. 00000 |
| 0. 00000 |    | 0. 00000 |    |   |           |          |            | ;        |
| 2        | 1  | 6        | 10 | 3 | 30. 33400 | 0. 00000 | -30. 33400 | 0. 00000 |
| 0. 00000 |    | 0. 00000 |    |   |           |          |            | ;        |
| 2        | 3  | 4        | 5  | 3 | 30. 33400 | 0. 00000 | -30. 33400 | 0. 00000 |
| 0. 00000 |    | 0. 00000 |    |   |           |          |            | ;        |
| 6        | 1  | 2        | 3  | 3 | 30. 33400 | 0. 00000 | -30. 33400 | 0. 00000 |
| 0. 00000 |    | 0. 00000 |    |   |           |          |            | ;        |
| 3        | 4  | 5        | 6  | 3 | 30. 33400 | 0. 00000 | -30. 33400 | 0. 00000 |
| 0. 00000 |    | 0. 00000 |    |   |           |          |            | ;        |
| 3        | 4  | 5        | 7  | 3 | 30. 33400 | 0. 00000 | -30. 33400 | 0. 00000 |
| 0. 00000 |    | 0. 00000 |    |   |           |          |            | ;        |
| 4        | 5  | 6        | 10 | 3 | 30. 33400 | 0. 00000 | -30. 33400 | 0. 00000 |
| 0. 00000 |    | 0. 00000 |    |   |           |          |            | ;        |
| 4        | 5  | 7        | 8  | 3 | 30. 33400 | 0. 00000 | -30. 33400 | 0. 00000 |
| 0. 00000 |    | 0. 00000 |    |   |           |          |            | ;        |
| 5        | 6  | 10       | 9  | 3 | 30. 33400 | 0. 00000 | -30. 33400 | 0. 00000 |
| 0. 00000 |    | 0. 00000 |    |   |           |          |            | ;        |
| 5        | 7  | 8        | 9  | 3 | 30. 33400 | 0. 00000 | -30. 33400 | 0. 00000 |
| 0. 00000 |    | 0. 00000 |    |   |           |          |            | ;        |

|         |         |    |    |   |          |         |           |         |
|---------|---------|----|----|---|----------|---------|-----------|---------|
| 5       | 7       | 8  | 29 | 3 | 30.33400 | 0.00000 | -30.33400 | 0.00000 |
| 0.00000 | 0.00000 |    |    |   |          |         |           |         |
| 6       | 5       | 7  | 8  | 3 | 30.33400 | 0.00000 | -30.33400 | 0.00000 |
| 0.00000 | 0.00000 |    |    |   |          |         |           |         |
| 6       | 10      | 9  | 8  | 3 | 30.33400 | 0.00000 | -30.33400 | 0.00000 |
| 0.00000 | 0.00000 |    |    |   |          |         |           |         |
| 6       | 10      | 9  | 11 | 3 | 30.33400 | 0.00000 | -30.33400 | 0.00000 |
| 0.00000 | 0.00000 |    |    |   |          |         |           |         |
| 7       | 5       | 6  | 10 | 3 | 30.33400 | 0.00000 | -30.33400 | 0.00000 |
| 0.00000 | 0.00000 |    |    |   |          |         |           |         |
| 7       | 8       | 9  | 10 | 3 | 30.33400 | 0.00000 | -30.33400 | 0.00000 |
| 0.00000 | 0.00000 |    |    |   |          |         |           |         |
| 7       | 8       | 9  | 11 | 3 | 30.33400 | 0.00000 | -30.33400 | 0.00000 |
| 0.00000 | 0.00000 |    |    |   |          |         |           |         |
| 7       | 8       | 29 | 27 | 3 | 30.33400 | 0.00000 | -30.33400 | 0.00000 |
| 0.00000 | 0.00000 |    |    |   |          |         |           |         |
| 8       | 9       | 11 | 26 | 3 | 30.33400 | 0.00000 | -30.33400 | 0.00000 |
| 0.00000 | 0.00000 |    |    |   |          |         |           |         |
| 8       | 29      | 27 | 26 | 3 | 30.33400 | 0.00000 | -30.33400 | 0.00000 |
| 0.00000 | 0.00000 |    |    |   |          |         |           |         |
| 8       | 29      | 27 | 28 | 3 | 30.33400 | 0.00000 | -30.33400 | 0.00000 |
| 0.00000 | 0.00000 |    |    |   |          |         |           |         |
| 9       | 8       | 29 | 27 | 3 | 30.33400 | 0.00000 | -30.33400 | 0.00000 |
| 0.00000 | 0.00000 |    |    |   |          |         |           |         |
| 9       | 11      | 26 | 25 | 3 | 30.33400 | 0.00000 | -30.33400 | 0.00000 |
| 0.00000 | 0.00000 |    |    |   |          |         |           |         |
| 9       | 11      | 26 | 27 | 3 | 30.33400 | 0.00000 | -30.33400 | 0.00000 |
| 0.00000 | 0.00000 |    |    |   |          |         |           |         |
| 10      | 9       | 8  | 29 | 3 | 30.33400 | 0.00000 | -30.33400 | 0.00000 |
| 0.00000 | 0.00000 |    |    |   |          |         |           |         |
| 10      | 9       | 11 | 26 | 3 | 30.33400 | 0.00000 | -30.33400 | 0.00000 |
| 0.00000 | 0.00000 |    |    |   |          |         |           |         |
| 11      | 9       | 8  | 29 | 3 | 30.33400 | 0.00000 | -30.33400 | 0.00000 |
| 0.00000 | 0.00000 |    |    |   |          |         |           |         |
| 11      | 26      | 25 | 23 | 3 | 30.33400 | 0.00000 | -30.33400 | 0.00000 |
| 0.00000 | 0.00000 |    |    |   |          |         |           |         |

|         |         |    |    |   |          |         |           |         |
|---------|---------|----|----|---|----------|---------|-----------|---------|
| 11      | 26      | 27 | 28 | 3 | 30.33400 | 0.00000 | -30.33400 | 0.00000 |
| 0.00000 | 0.00000 |    |    |   |          |         |           |         |
| 11      | 26      | 27 | 29 | 3 | 30.33400 | 0.00000 | -30.33400 | 0.00000 |
| 0.00000 | 0.00000 |    |    |   |          |         |           |         |
| 19      | 20      | 21 | 22 | 3 | 30.33400 | 0.00000 | -30.33400 | 0.00000 |
| 0.00000 | 0.00000 |    |    |   |          |         |           |         |
| 19      | 24      | 23 | 22 | 3 | 30.33400 | 0.00000 | -30.33400 | 0.00000 |
| 0.00000 | 0.00000 |    |    |   |          |         |           |         |
| 19      | 24      | 23 | 25 | 3 | 30.33400 | 0.00000 | -30.33400 | 0.00000 |
| 0.00000 | 0.00000 |    |    |   |          |         |           |         |
| 19      | 24      | 28 | 27 | 3 | 30.33400 | 0.00000 | -30.33400 | 0.00000 |
| 0.00000 | 0.00000 |    |    |   |          |         |           |         |
| 20      | 19      | 24 | 23 | 3 | 30.33400 | 0.00000 | -30.33400 | 0.00000 |
| 0.00000 | 0.00000 |    |    |   |          |         |           |         |
| 20      | 19      | 24 | 28 | 3 | 30.33400 | 0.00000 | -30.33400 | 0.00000 |
| 0.00000 | 0.00000 |    |    |   |          |         |           |         |
| 20      | 21      | 22 | 23 | 3 | 30.33400 | 0.00000 | -30.33400 | 0.00000 |
| 0.00000 | 0.00000 |    |    |   |          |         |           |         |
| 21      | 20      | 19 | 24 | 3 | 30.33400 | 0.00000 | -30.33400 | 0.00000 |
| 0.00000 | 0.00000 |    |    |   |          |         |           |         |
| 21      | 22      | 23 | 24 | 3 | 30.33400 | 0.00000 | -30.33400 | 0.00000 |
| 0.00000 | 0.00000 |    |    |   |          |         |           |         |
| 21      | 22      | 23 | 25 | 3 | 30.33400 | 0.00000 | -30.33400 | 0.00000 |
| 0.00000 | 0.00000 |    |    |   |          |         |           |         |
| 22      | 23      | 24 | 28 | 3 | 30.33400 | 0.00000 | -30.33400 | 0.00000 |
| 0.00000 | 0.00000 |    |    |   |          |         |           |         |
| 22      | 23      | 25 | 26 | 3 | 30.33400 | 0.00000 | -30.33400 | 0.00000 |
| 0.00000 | 0.00000 |    |    |   |          |         |           |         |
| 23      | 24      | 28 | 27 | 3 | 30.33400 | 0.00000 | -30.33400 | 0.00000 |
| 0.00000 | 0.00000 |    |    |   |          |         |           |         |
| 23      | 25      | 26 | 27 | 3 | 30.33400 | 0.00000 | -30.33400 | 0.00000 |
| 0.00000 | 0.00000 |    |    |   |          |         |           |         |
| 24      | 23      | 25 | 26 | 3 | 30.33400 | 0.00000 | -30.33400 | 0.00000 |
| 0.00000 | 0.00000 |    |    |   |          |         |           |         |
| 24      | 28      | 27 | 26 | 3 | 30.33400 | 0.00000 | -30.33400 | 0.00000 |
| 0.00000 | 0.00000 |    |    |   |          |         |           |         |

```

    24  28  27  29    3  30.33400  0.00000 -30.33400  0.00000
0.00000  0.00000 ;
    25  23  24  28    3  30.33400  0.00000 -30.33400  0.00000
0.00000  0.00000 ;
    25  26  27  28    3  30.33400  0.00000 -30.33400  0.00000
0.00000  0.00000 ;
    25  26  27  29    3  30.33400  0.00000 -30.33400  0.00000
0.00000  0.00000 ;
     4   6   5   7    3   9.20480  0.00000  -9.20480  0.00000
0.00000  0.00000 ;
     1   5   6  10    3   9.20480  0.00000  -9.20480  0.00000
0.00000  0.00000 ;
     7   9   8  29    3   9.20480  0.00000  -9.20480  0.00000
0.00000  0.00000 ;
     8  10   9  11    3   9.20480  0.00000  -9.20480  0.00000
0.00000  0.00000 ;
    22  24  23  25    3   9.20480  0.00000  -9.20480  0.00000
0.00000  0.00000 ;
    19  23  24  28    3   9.20480  0.00000  -9.20480  0.00000
0.00000  0.00000 ;
    11  25  26  27    3   9.20480  0.00000  -9.20480  0.00000
0.00000  0.00000 ;
    26  28  27  29    3   9.20480  0.00000  -9.20480  0.00000
0.00000  0.00000 ;

```

```
#ifdef N2MOL
```

```
; n2m.itp
```

```
[ moleculetype ]
```

```
;name          nrexcl
n2m             3
```

```
[ atoms ]
```

```
;  nr  type  resi  res  atom  cgnr    charge    mass    typeB    chargeB
   1  n1    1  GAS   N1    1    0.00000   14.01000 ; qtot 0.000
   2  n1    1  GAS   N2    2    0.00000   14.01000 ; qtot 0.000
```



```
[ bonds ]
; ai    aj funct  r          k
    1    2    1    1.1240e-01  1.0223e+06 ;    N1 - N2
#endif

; end of itp
```
